# Supplementary material for: Computational Analysis of the Ligand-Binding Sites of the Molecular Chaperone OppA from Yersinia pseudotuberculosis
Source: MDPI journal article supplement (doi:10.3390/ijms24044023), 2023-02-16
Supplement: s1 [file s1]

# Computational analysis of the interactions of OppA from *Yersinia pseudotuberculosis* and its ligands.

Mirian Becerril Ramírez<sup>1</sup>, Lucía Soto Urzúa<sup>1</sup>, María de los Ángeles Martínez Martínez<sup>2</sup> and Luis Javier Martínez Morales<sup>1\*</sup>

<sup>1</sup>Centro de Investigaciones en Ciencias Microbiológicas, Instituto de Ciencias. <sup>2</sup>Facultad de Medicina. Benemérita Universidad Autónoma de Puebla. México.

## Supplementary material

Figure S1

OppA interaction zones with four different enzymes (Mal12, LDH, *EcoRI* and THG)

### MAL12 enzyme

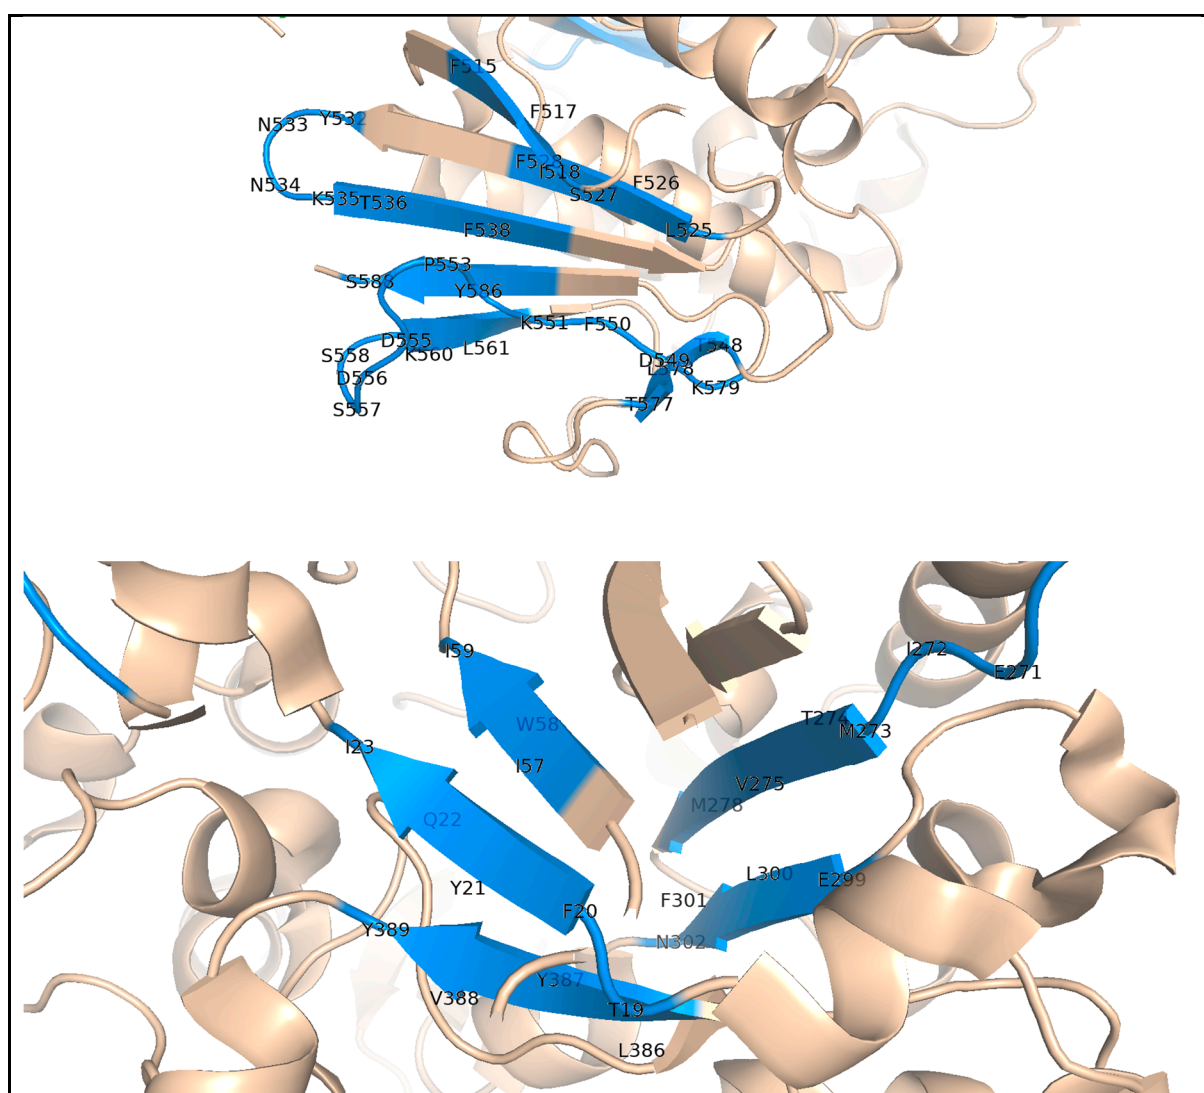

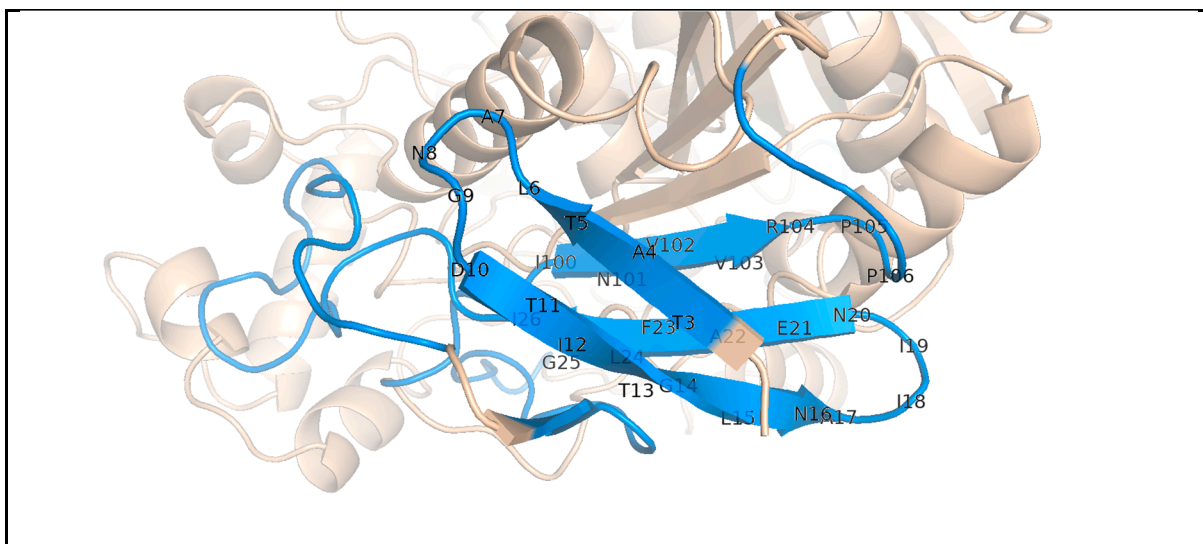

LDH-A enzyme

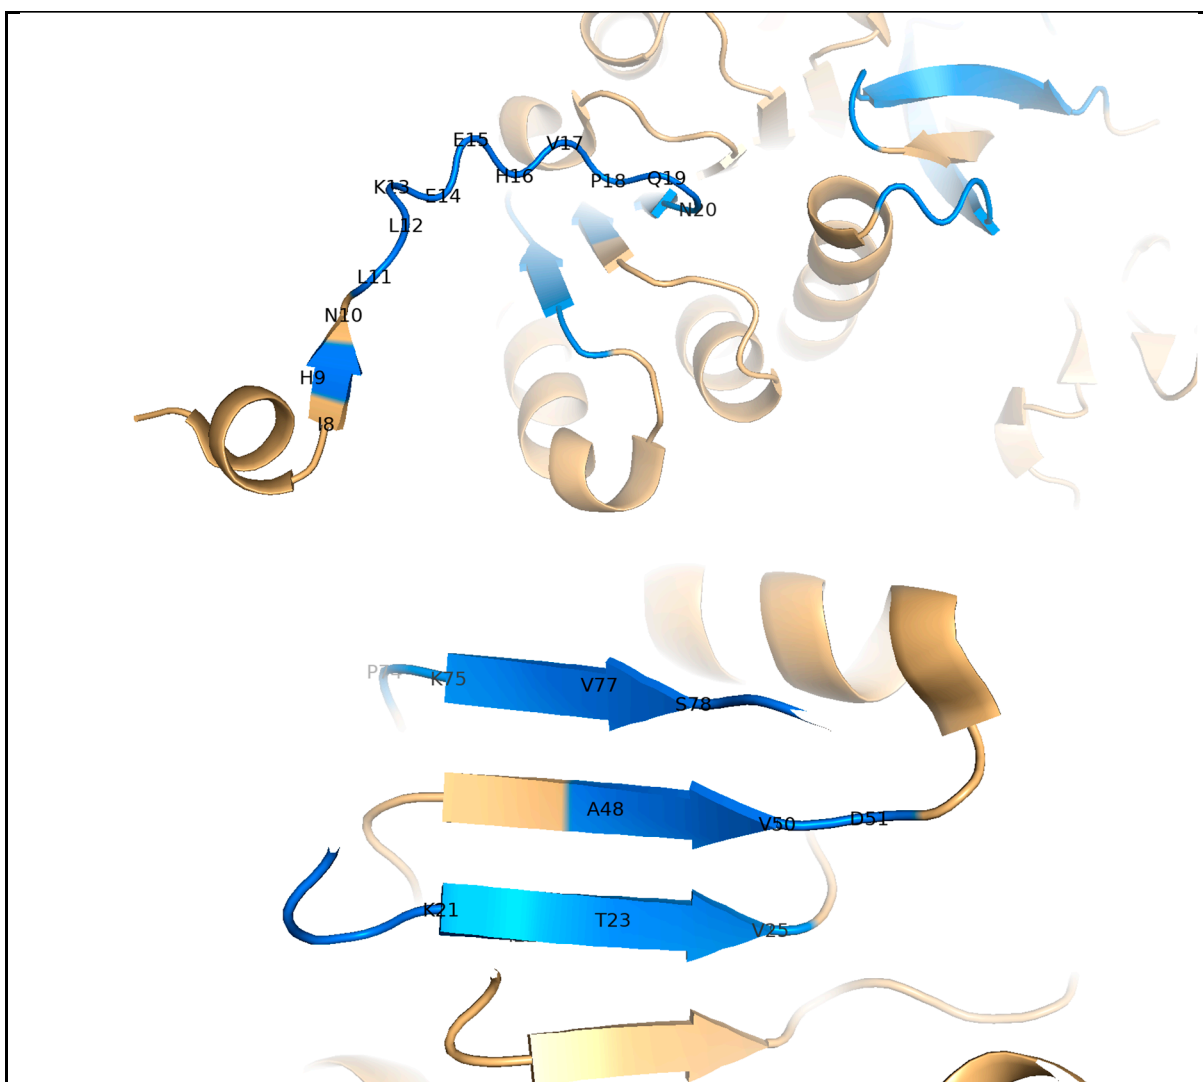

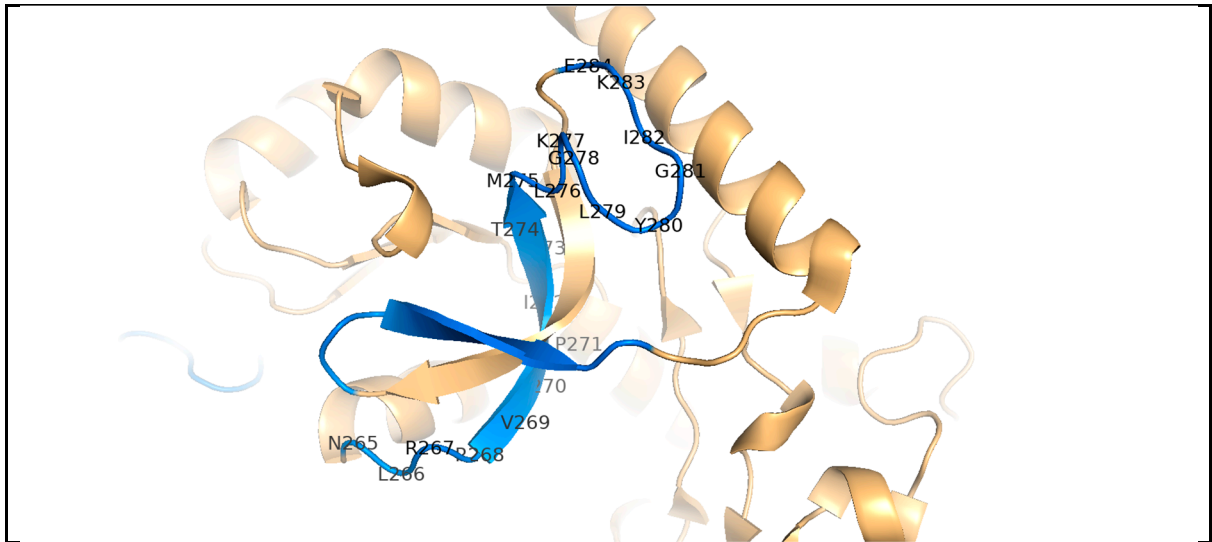

*EcoRI* enzyme

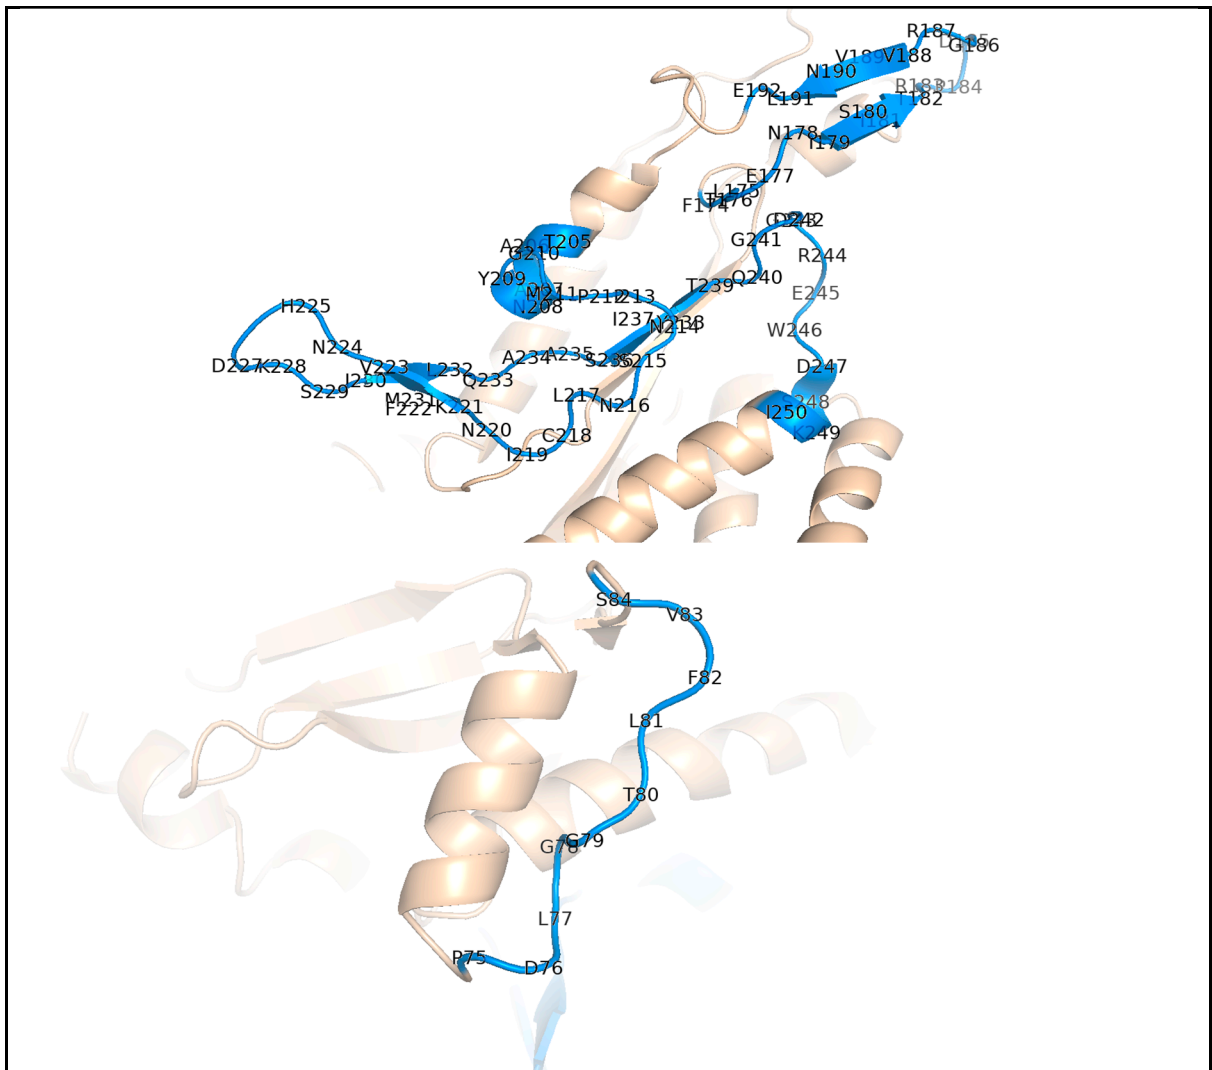

## THG enzyme

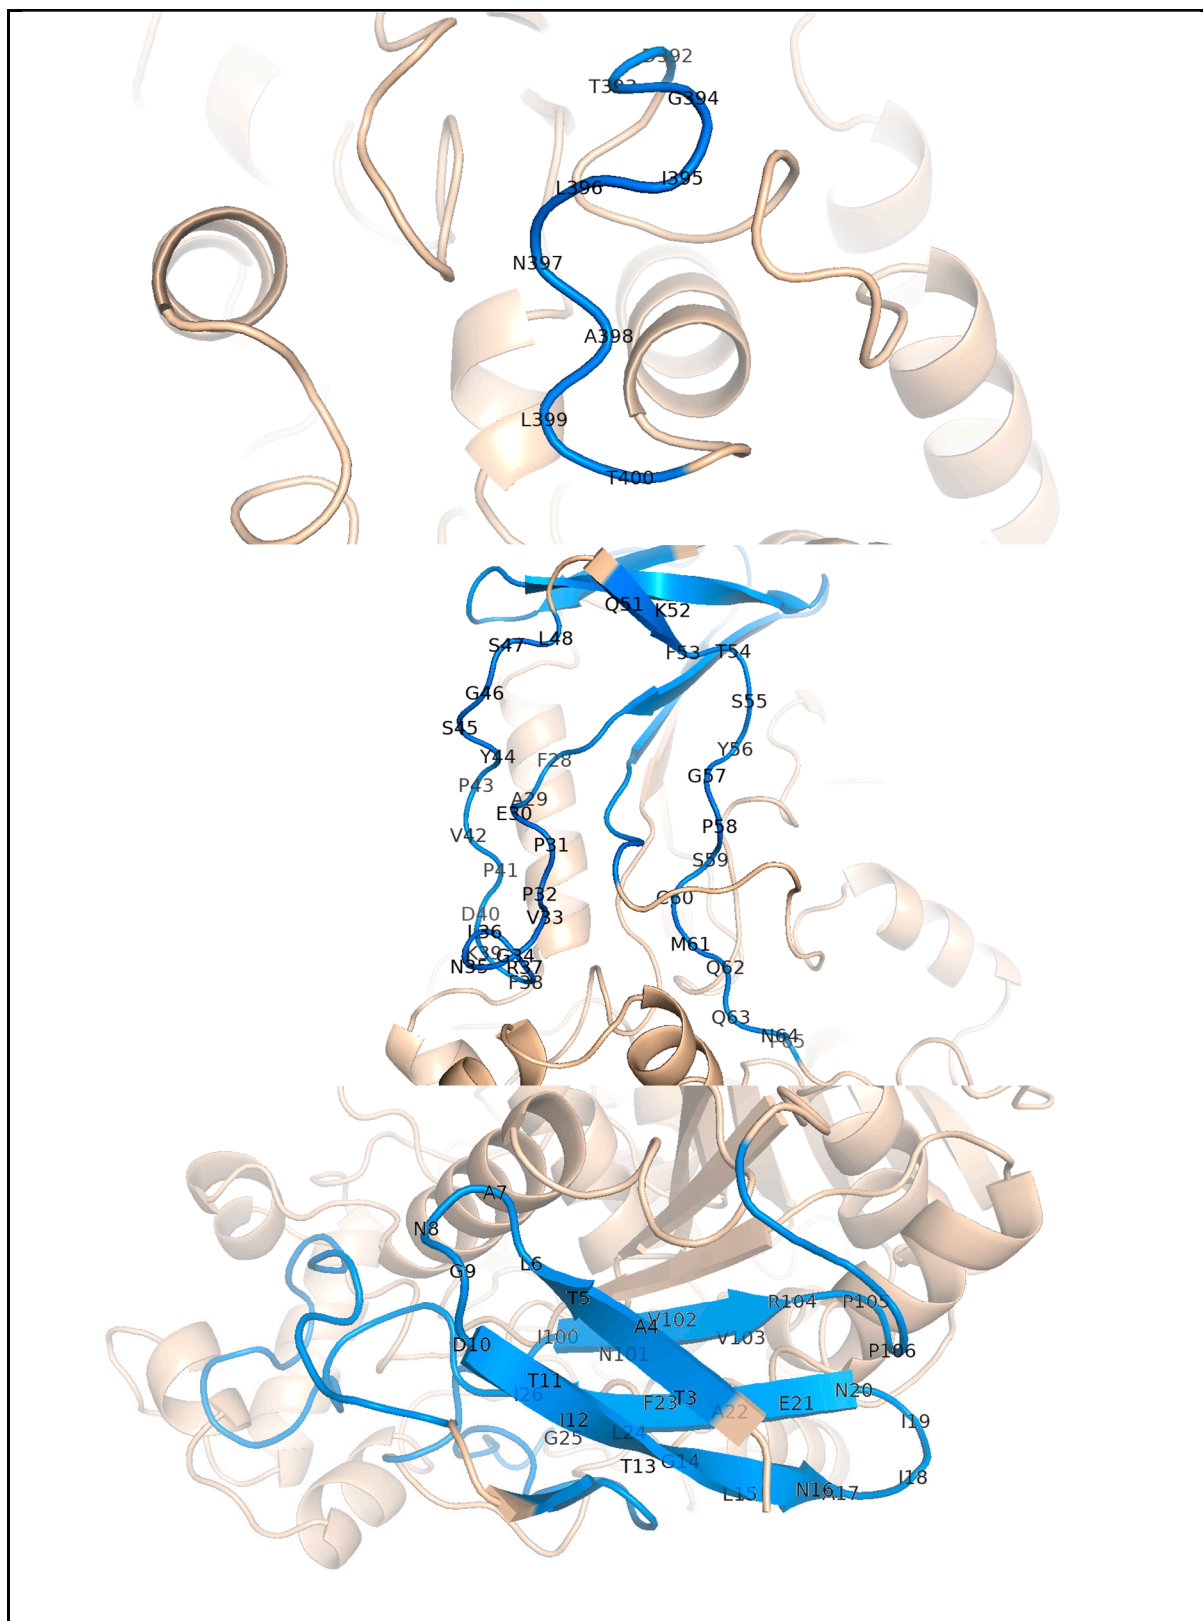

Table S1

## HYDROGEN-BOND NETWORK AA

| Enzyme                       | OppA                                                                                                                     |
|------------------------------|--------------------------------------------------------------------------------------------------------------------------|
| Mal12_4.5                    |                                                                                                                          |
| PHE, LYS, LEU, GLU, PHE, GLY | TYR_485, TYR_245, ARG_413, VAL_34, CYS_417, GLN_32, GLY_33, SER_37, ALA_418, TYR_269, ASN_246                            |
| MAL12_5.5:                   |                                                                                                                          |
| THR, VAL, GLY, GLU, MET GLN  | TYR_109, CYS_417, ALA_415, GLY_20, ASN_366, ARG_413, TYR_245, GLU_32, ASP_419                                            |
| LDH_1.2                      |                                                                                                                          |
| GLY, SER, ASP, VAL, VAL      | ASP_419, TYR_109, CYS_417, ARG_404, ARG_413, HIS_371, SER_37, ALA_418                                                    |
| LDH_4.4                      |                                                                                                                          |
| LYS, ILE, VAL                | TYR_109, GLU_32, VAL_34, ALA_415, HIS_371, ARG_413, CYS_417, ALA_418, ASP_419                                            |
| EcoRI_3.1                    |                                                                                                                          |
| ARG, VAL, LEU, GLY, ARG      | TYR_109, CYS_417, ARG_413, HIS_371, GLU_396, GLU_229, THR_367, SER_227, ALA_418, ASP_419                                 |
| EcoRI_5.1                    |                                                                                                                          |
| ASP, ASP, LEU, THR, PHE      | TYR_269, ARG_41, ASN_506, HIS_161, SER_37, CYS_417, GLU_32, VAL_34, ARG_413, TYR_245, ASN_247, HIS_371, ASN_366, ARG_413 |
| THG_2.1                      |                                                                                                                          |
| GLY, LEU, ALA, ASP, PHE      | HIS_161, CYS_417, ARG_404, ALA_415, ARG_413, THR_367, ASN_366, SER_21, TYR_245, ASN_246, VAL_34, TYR_269                 |
| THG_3.1                      |                                                                                                                          |
| PHE, LYS LEU, GLU, PHE       | GLU_32, ARG_404, ASN_366, HIS_371, TYR_245, ALA_415, VAL_34                                                              |

Table S2

AA THAT HAS OPPA'S HYDROPHOBIC INTERACTIONS WITH Mal12, LDH, *EcoRI* and THG.

| Enzime                       | OppA                                                                                                                                                                                          |
|------------------------------|-----------------------------------------------------------------------------------------------------------------------------------------------------------------------------------------------|
| Mal12_4.5                    |                                                                                                                                                                                               |
| PHE, LYS, LEU, GLU, PHE, GLY | SER_487, HIS_371, ASN_247, ALA_415, ASN_38, PRO_35, LEU_504, ASP_505, ARG_41, ASN_506, HIS_161, ILE_31, TYR_109, TRP_416, LEU_401, TRP_397, ARG_404                                           |
| MAL12_5.5:                   |                                                                                                                                                                                               |
| THR, VAL, GLY, GLU, MET GLN  | TRP_416, ASN_436, GLY_33, ARG_404, TRP_397, SER_227, SER_21, GLU_229, THR_367, SER_368, PRO_35, HIS_371, TYR_269, ASN_247, ASN_246, VAL_34, TYR_485, CYS_271                                  |
|                              |                                                                                                                                                                                               |
| LDH_1.2                      |                                                                                                                                                                                               |
| GLY, ILE, SER, ASP, VAL, VAL | PRO_162, LEU_504, HIS_161, TRP_416, GLY_33, GLU_32, ALA_415, SER_368, TYR_485, GLU_229, TRP_397, GLY_20, SER_21, PRO_35, ASN_247, ASN_366, ASN_246, VAL_34, ARG_41, ASN_506, ASP_505, TYR_269 |
| LDH_4.4                      |                                                                                                                                                                                               |
| LYS, ILE, THR, VAL, VAL      | TRP_416, ASN_506, ARG_404, LEU_401, ASN_247, TYR_485, PRO_335, SER_21, GLU_229, TYR_245, GLY_20, ASN_366, TRP_397, SER_37, HIS_161, GLY_33                                                    |
|                              |                                                                                                                                                                                               |
| <i>EcoRI</i> _3.1            |                                                                                                                                                                                               |
| ARG, VAL, LEU, GLY, ARG      | PRO_162, HIS_161, TRP_416, ALA_415, TYR_269, SER_21, PRO_35, GLY_20, ASN_366, SER_368, ASN_246, ASN_247, TYR_245, TRP_397, TYR_485, VAL_34, GLY_33, SER_37, ASN_506, GLU_32                   |
| <i>EcoRI</i> _5.1            |                                                                                                                                                                                               |
| ASP, ASP, LEU, THR, PHE      | ASP_419, TYR_109, TRP_416, GLY_33, ALA_418, ARG_404, ALA_415, TRP_397, THR_367, SER_227, GLY_20, SER_21, PRO_35, ASP_505, LEU_504                                                             |
|                              |                                                                                                                                                                                               |
| THG_2.1                      |                                                                                                                                                                                               |
| GLY, LEU, LYS, ALA, ASP, PHE | ASP_419, SER_37, TRP_416, GLU_32, TYR_109, LEU_401, SER_227, GLY_20, HIS_371, SER_368, PRO_35, GLU_229, TRP_397, ASN_247, ASN_506, GLY_33, ALA_418, LEU_504                                   |
| THG_3.1                      |                                                                                                                                                                                               |
| PHE, LYS LEU, GLU, PHE, GLY  | ASP_419, TYR_109, ARG_413, MET_429, GLY_33, TRP_416, LEU_401, ALA_414, TRP_397, THR_367, SER_21, GLU_396, SER_227, SER_368, GLY_20, ILE_226, GLU_229, ASP_232, ASN_18, ASN_247,               |

|  |                                                                |
|--|----------------------------------------------------------------|
|  | ASN_246, PRO_35, TYR_269, TYR_485, CLY_417,<br>SER_37, HIS_161 |
|--|----------------------------------------------------------------|

Table S2

Hydrogen bond distance values and average (in Å) between OppA and Mal12, LDH, *EcoRI*, THG.

|                   | 1              | 2              | 3              | 4              | 5              | 6              | 7              | 8              | 9              | 10             | 11             | 12             | 13             | 14             | 15             | 16 | Average |
|-------------------|----------------|----------------|----------------|----------------|----------------|----------------|----------------|----------------|----------------|----------------|----------------|----------------|----------------|----------------|----------------|----|---------|
| <b>Mal 12_4.5</b> | 2.3<br>Ala 418 | 3.0<br>Asp 419 | 3.0<br>Asp 419 | 3.1<br>Cys 417 | 2.9<br>Cys 417 | 3.0<br>Gly 33  | 2.6<br>Ser 37  | 2.9<br>Cys 417 | 2.8<br>Glu 32  | 2.3<br>Val 34  | 3.2<br>Arg 413 | 3.0<br>Tyr 245 | 2.8<br>Tyr 485 | 3.0<br>Asn 246 | 2.5<br>Tyr 269 |    | 2.8     |
| <b>Mal 12_5.5</b> | 3.1<br>Asp 419 | 2.8<br>Tyr 109 | 3.0<br>Cys 417 | 3.1<br>Cys 417 | 2.7<br>Glu 32  | 2.6<br>Ala 415 | 2.5<br>Tyr 245 | 3.3<br>Arg 413 | 2.5<br>Arg 413 | 2.8<br>Arg 413 | 2.9<br>Asn 366 | 2.9<br>Gly 20  |                |                |                |    | 2.8     |
| <b>LDH_1.2</b>    | 3.1<br>Asp 419 | 3.1<br>Ala 418 | 2.7<br>Ser 37  | 3.2<br>Asp 419 | 3.1<br>Tyr 109 | 2.8<br>Cys 417 | 2.2<br>Arg 404 | 2.7<br>Arg 413 | 2.9<br>His 371 | 3.0<br>Tyr 245 | 3.9<br>His 371 |                |                |                |                |    | 3.0     |
| <b>LDH_4.4</b>    | 3.1<br>Ala 418 | 3.2<br>Trp 416 | 2.9<br>Cys 417 | 2.8<br>Cys 418 | 2.8<br>Asp 419 | 2.8<br>Tyr 109 | 2.6<br>Glu 32  | 3.2<br>Val 34  | 2.6<br>Ala 415 | 3.0<br>Arg 413 | 2.3<br>Arg 413 | 2.8<br>His 371 |                |                |                |    | 2.8     |
| <b>EcoRI_3.1</b>  | 3.0<br>Thr 367 | 2.8<br>Glu 229 | 3.0<br>Thr 367 | 2.8<br>Ser 227 | 2.9<br>His 371 | 2.5<br>Arg 413 | 3.0<br>Arg 413 | 3.3<br>Arg 413 | 3.1<br>Cys 417 | 2.9<br>Cys 417 | 3.1<br>Tyr 109 | 3.0<br>Ala 418 | 3.0<br>Ala 418 |                |                |    | 2.9     |
| <b>EcoRI_5.1</b>  | 2.8<br>Tyr 269 | 3.1<br>Arg 41  | 3.3<br>Asn 506 | 2.7<br>His 161 | 2.8<br>Ser 37  | 2.7<br>Ser 37  | 2.7<br>Cys 417 | 3.1<br>Glu 32  | 3.7<br>Val 34  | 3<br>Arg 413   | 2.7<br>Tyr 245 | 2.4<br>Asn 247 | 2.8<br>His 371 | 2.5<br>Asn 366 | 2.7<br>Arg 413 | 3  | 2.9     |
| <b>THG_2.1</b>    | 2.8<br>Thr 367 | 2.2<br>Asn 366 | 2.9<br>Ser 21  | 2.8<br>Tyr 245 | 3<br>Asn 246   | 3.2<br>Tyr 269 | 3.1<br>Arg 413 | 2.1<br>Arg 413 | 3.0<br>Val 34  | 3.0<br>Arg 404 | 3.0<br>Arg 404 | 3.0<br>Ala 415 | 3.1<br>Cys 417 | 3.2<br>His 161 |                |    | 2.9     |
| <b>THG_3.1</b>    | 2.0<br>Val 34  | 2.8<br>Glu 32  | 2.8<br>Glu 32  | 2.7<br>Arg 404 | 3.2<br>Ala 415 | 3.2<br>Tyr 245 | 3.0<br>Asn 366 | 3.7<br>His 371 | 2.2<br>Asn 366 |                |                |                |                |                |                |    | 2.8     |
